# Supplementary material for: Concordance of SNP- and allele-based typing workflows in the context of a large-scale international Salmonella Enteritidis outbreak investigation
Source: PubMed Central journal article supplement — Microb Genom. 2020 Feb 26;6(3):e000318. doi: 10.1099/mgen.0.000318 (PMC7200063; doi:10.1099/mgen.0.000318), 2020-02-26
Supplement: mgen-6-318-s001.pdf [file mgen-6-318-s001.pdf]

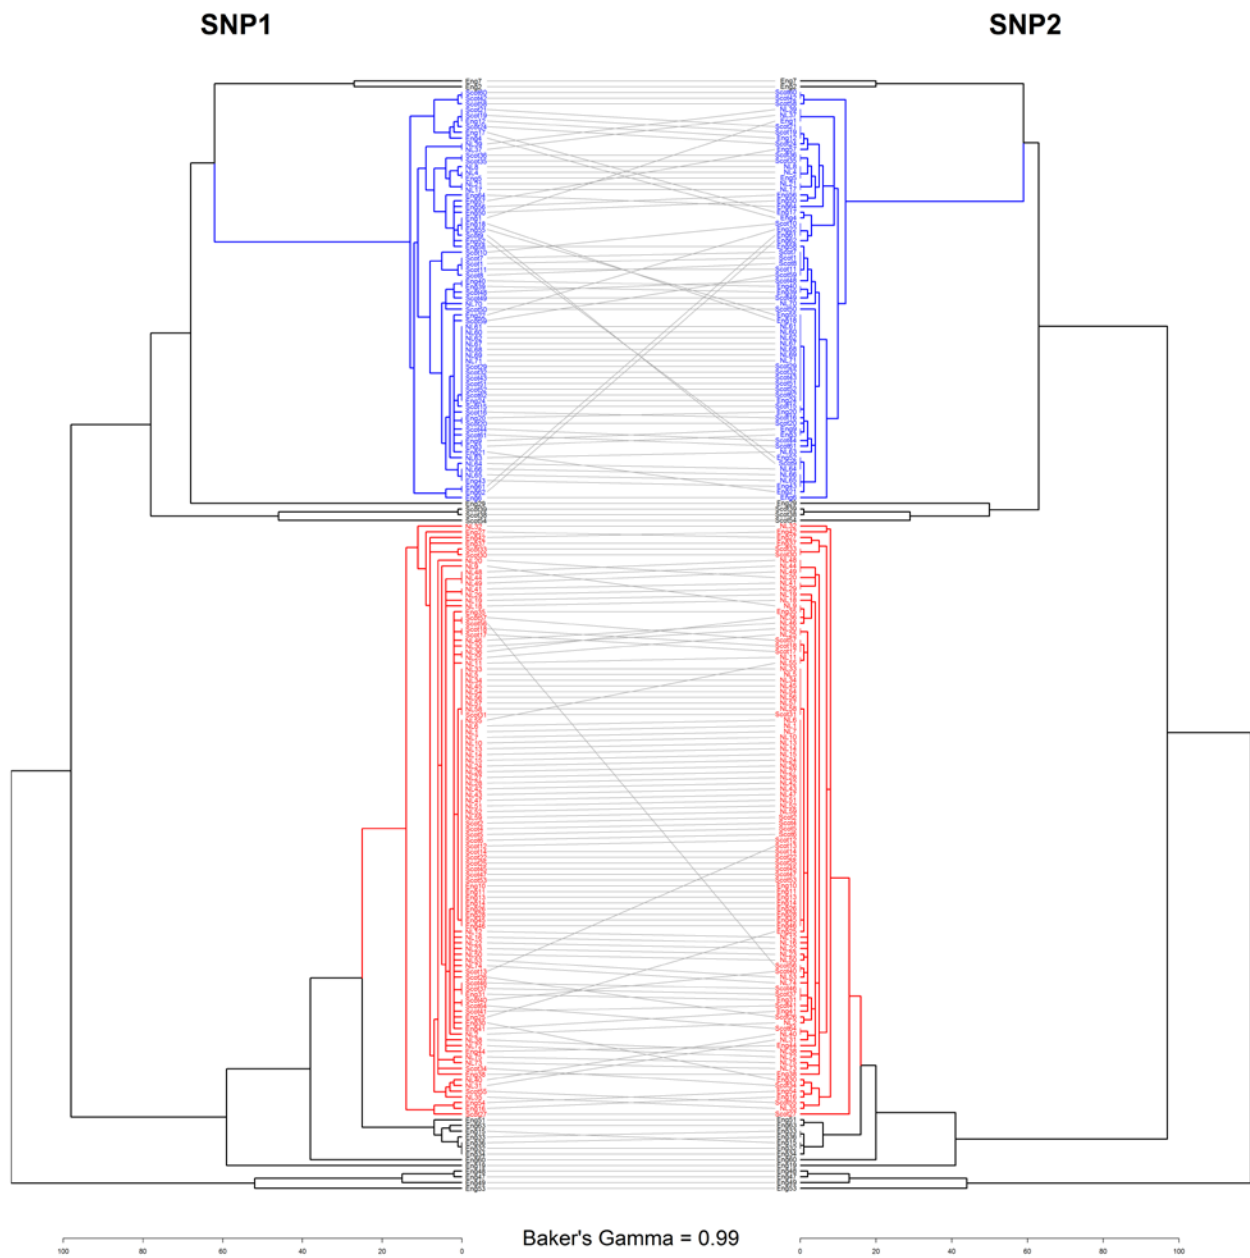

Figure S1. Tanglegram of SNP1 and SNP2 partitions using complete linkage. The outbreak clusters 1 and 2 are shown in red and blue, respectively.

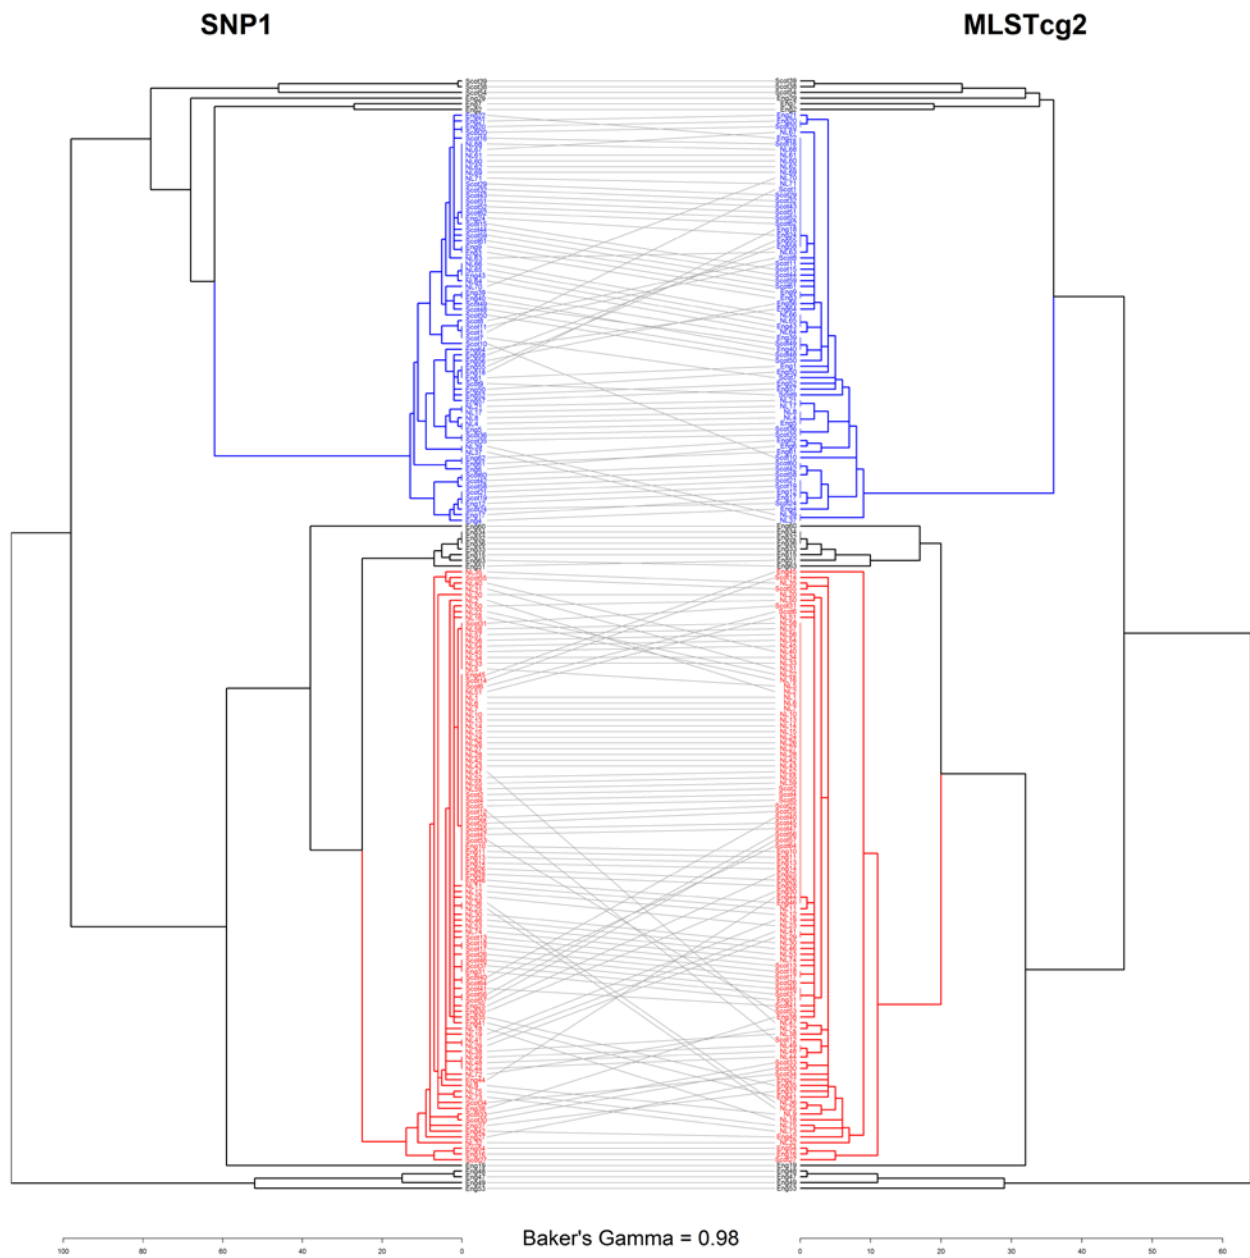

Figure S2. Tanglegram of SNP1 and MLSTcg2 partitions using complete linkage. The outbreak clusters 1 and 2 are shown in red and blue, respectively.

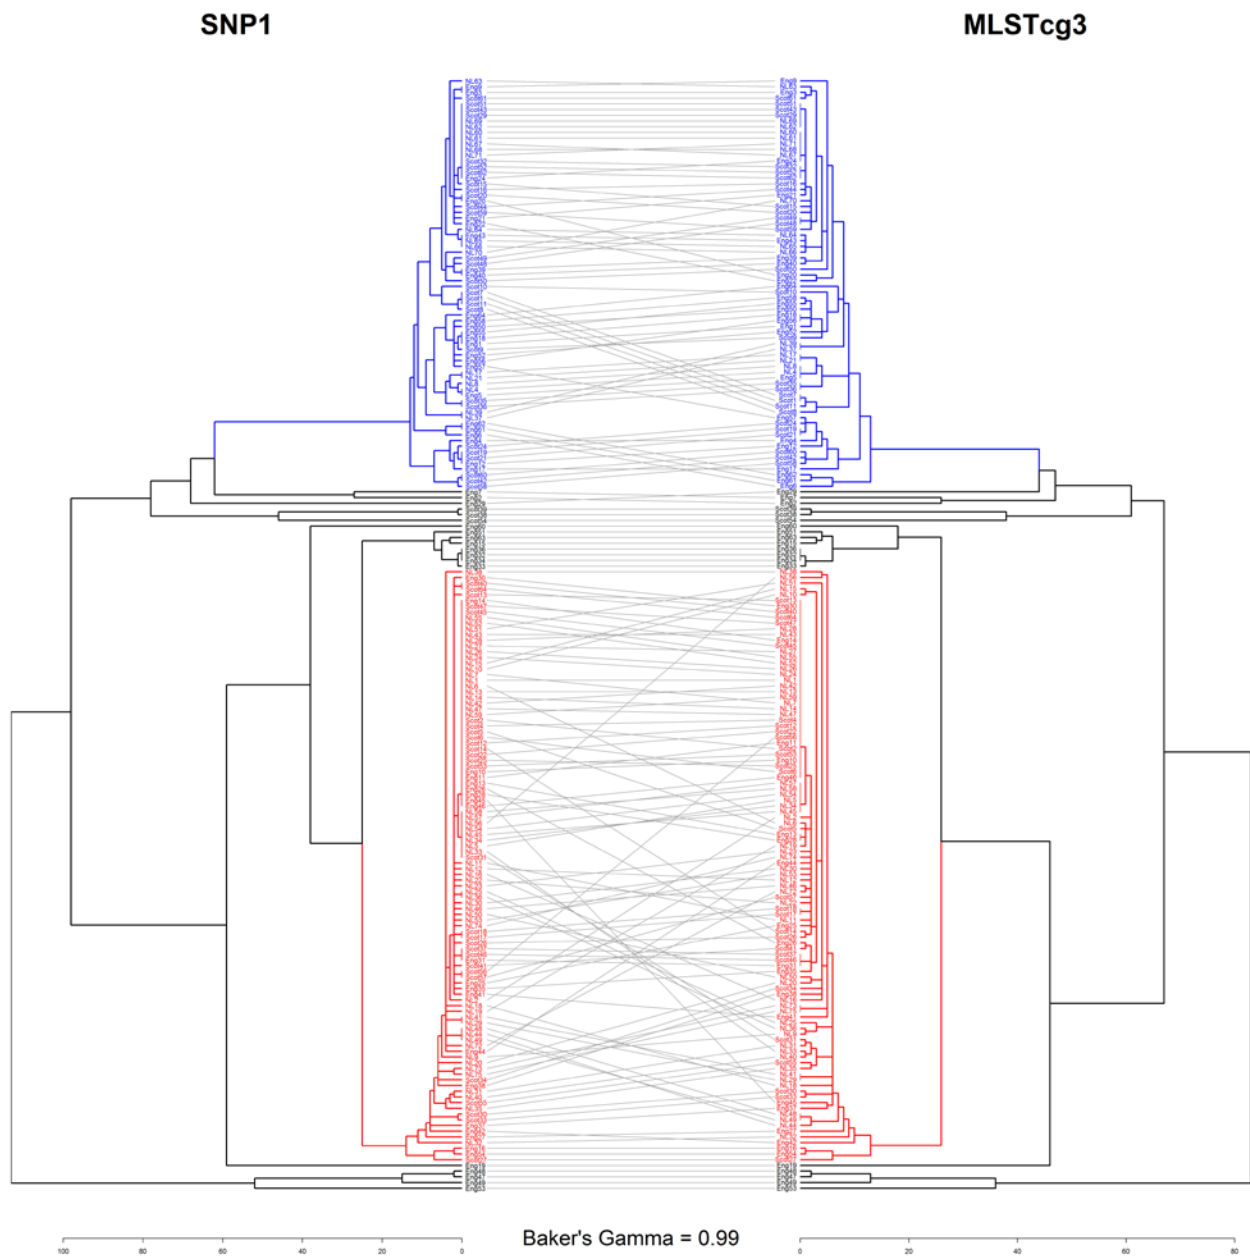

Figure S3. Tanglegram of SNP1 and MLSTcg3 partitions using complete linkage. The outbreak clusters 1 and 2 are shown in red and blue, respectively.

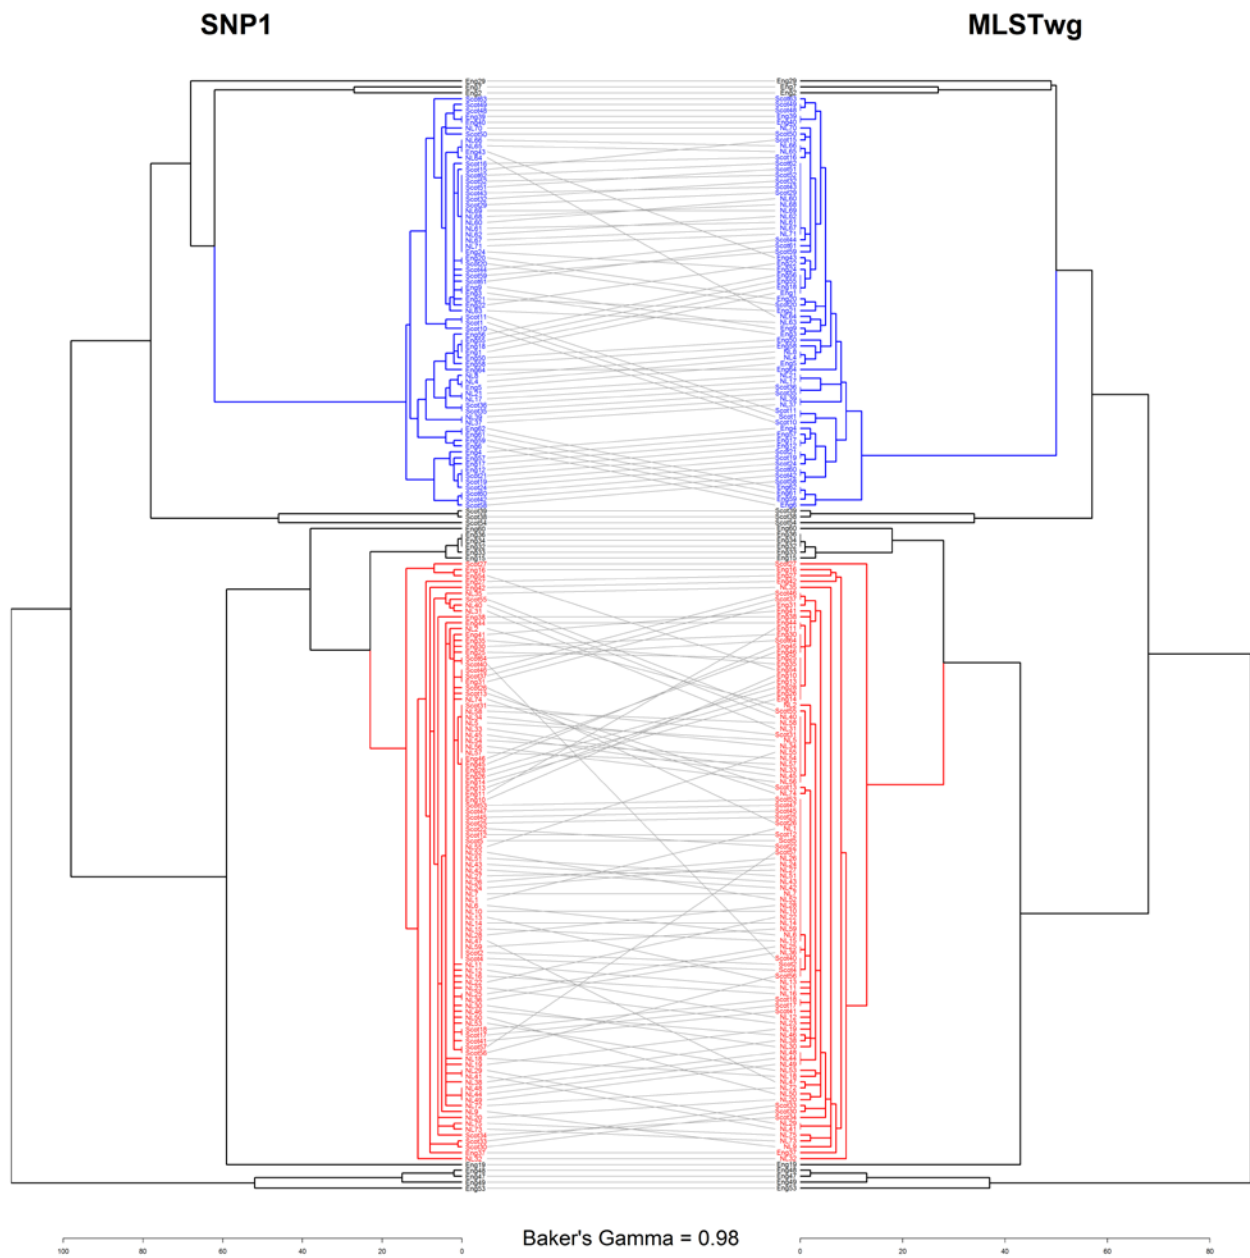

Figure S4. Tanglegram of SNP1 and MLSTwg partitions using complete linkage. The outbreak clusters 1 and 2 are shown in red and blue, respectively.

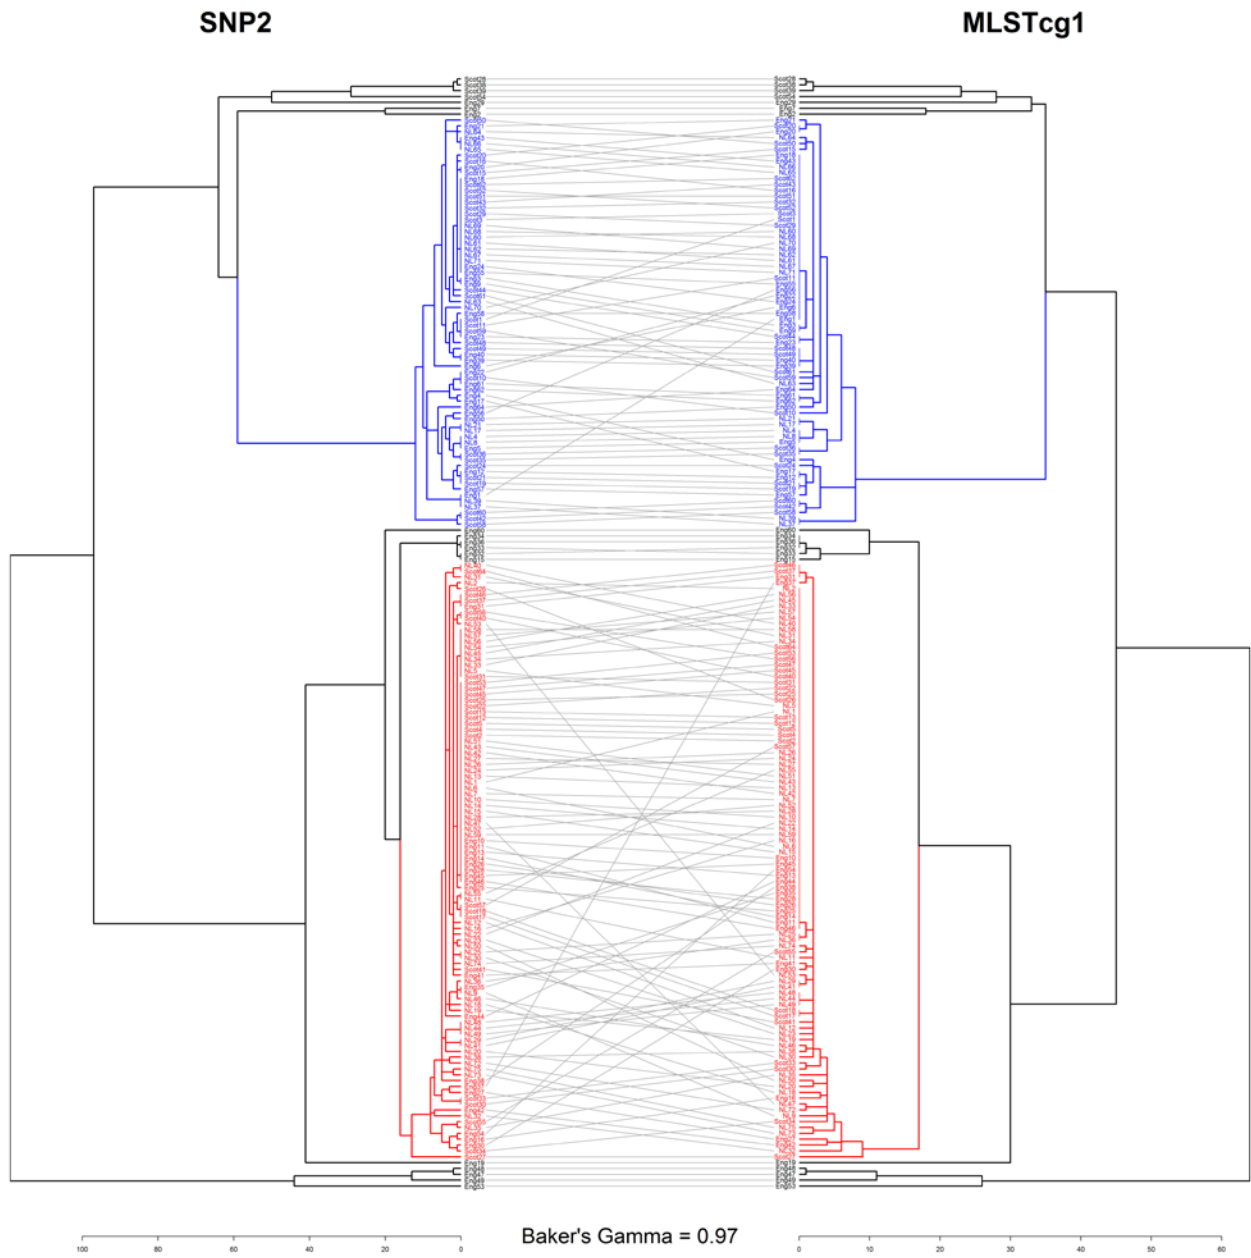

Figure S5. Tanglegram of SNP2 and MLSTcg1 partitions using complete linkage. The outbreak clusters 1 and 2 are shown in red and blue, respectively.

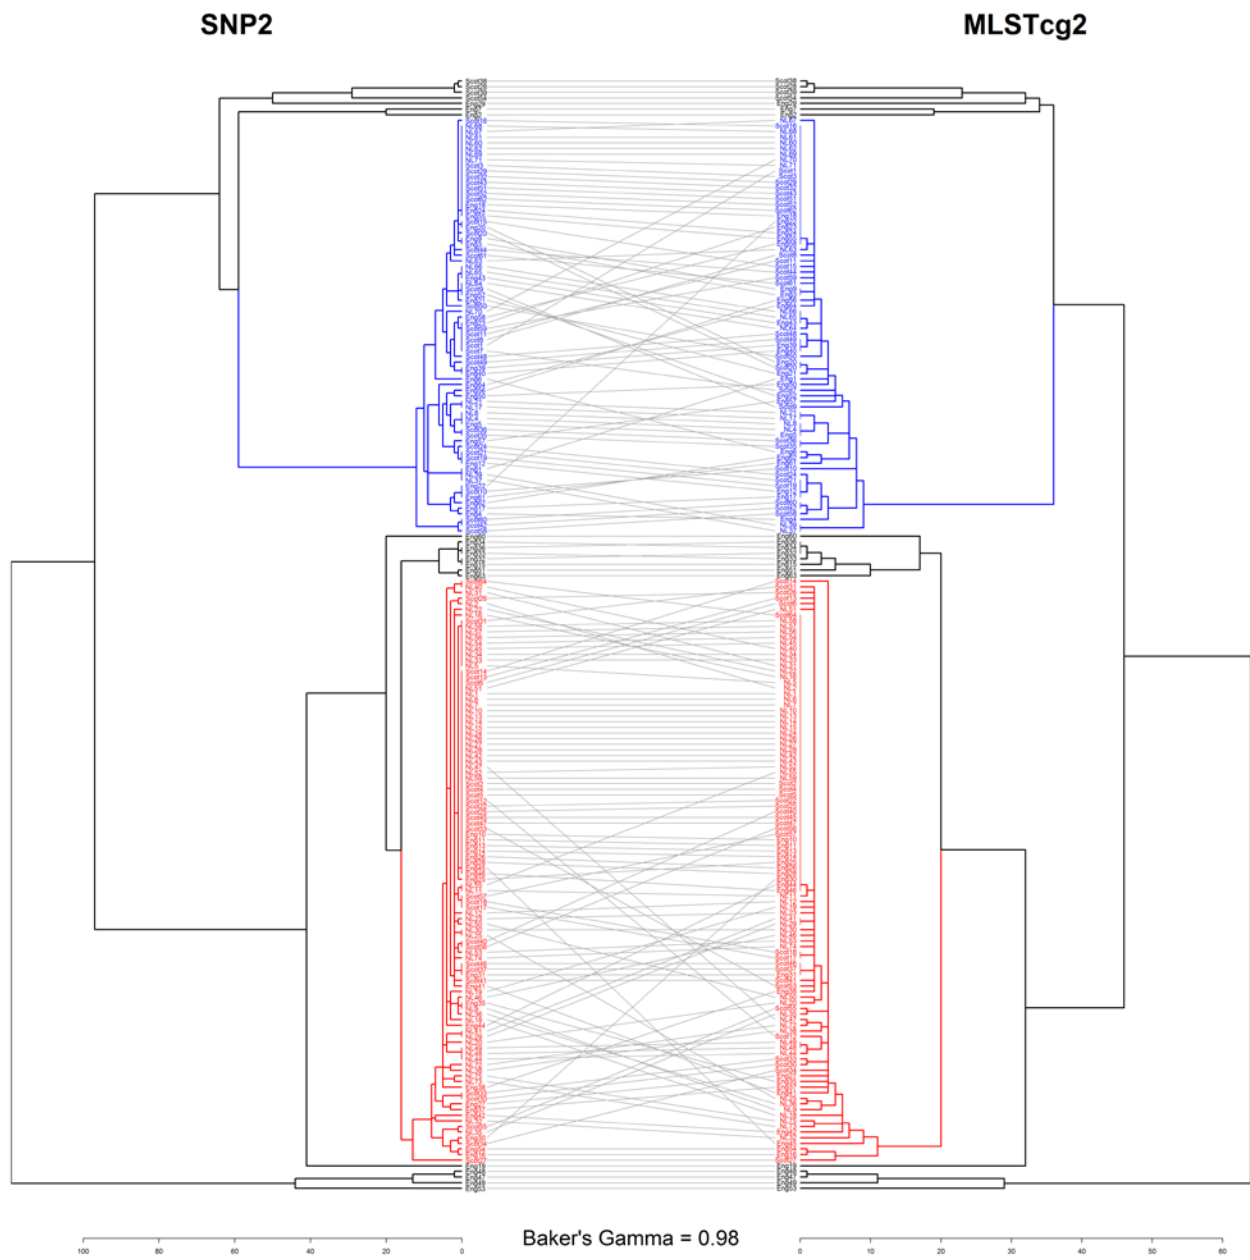

Figure S6. Tanglegram of SNP2 and MLSTcg2 partitions using complete linkage. The outbreak clusters 1 and 2 are shown in red and blue, respectively.

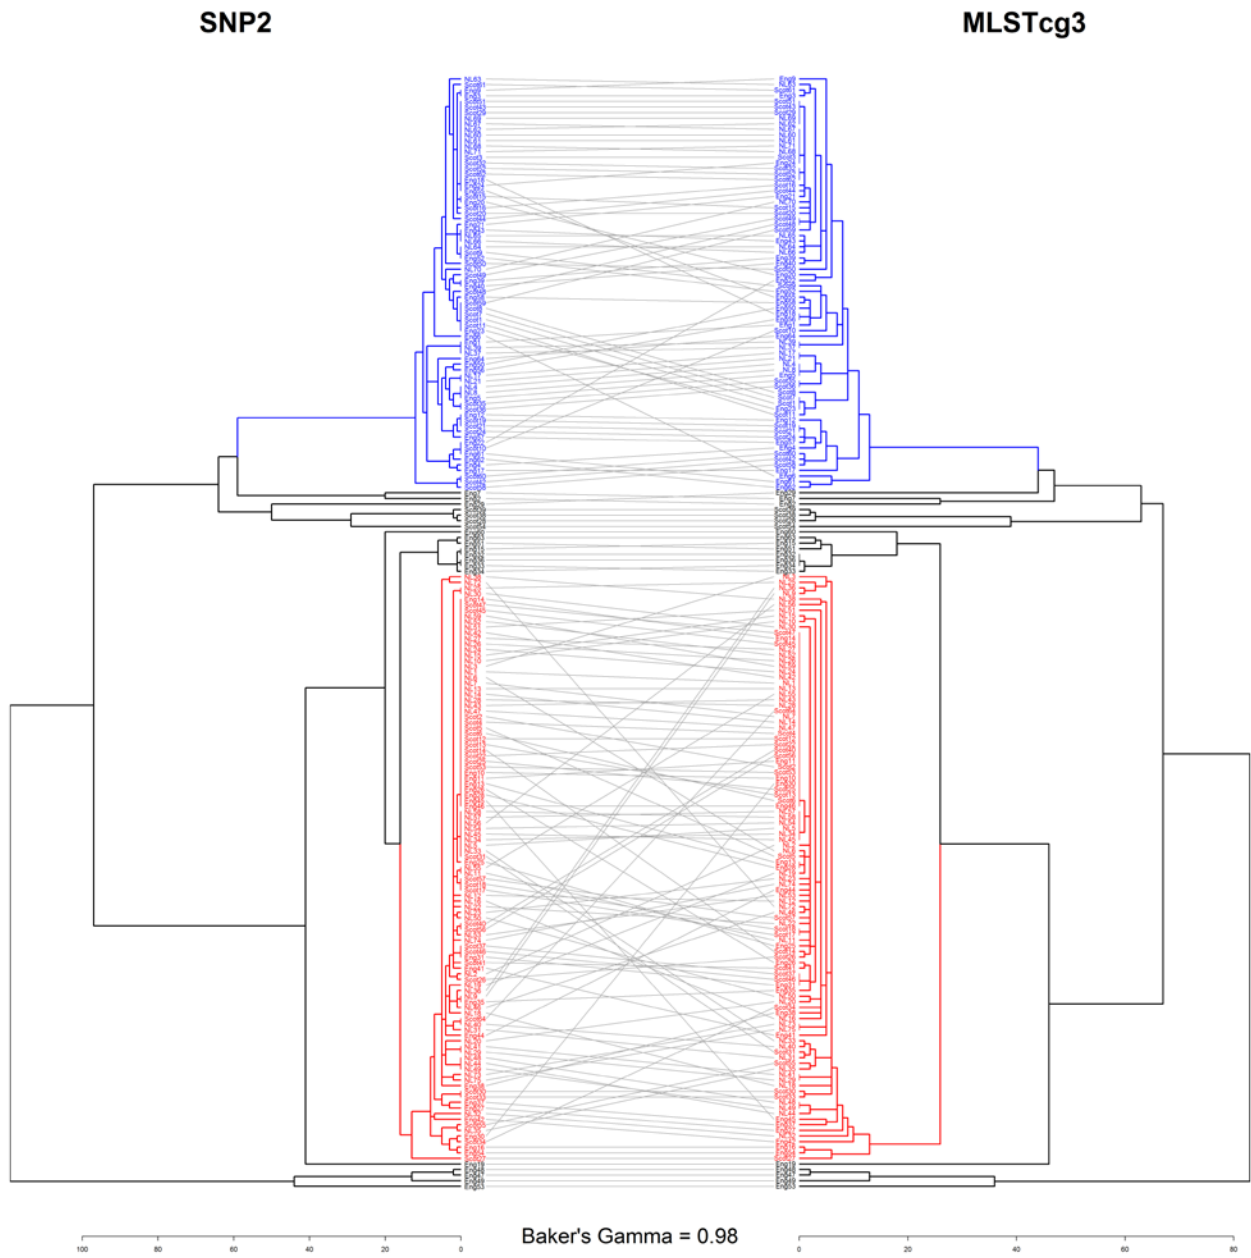

Figure S7. Tanglegram of SNP2 and MLSTcg3 partitions using complete linkage. The outbreak clusters 1 and 2 are shown in red and blue, respectively.

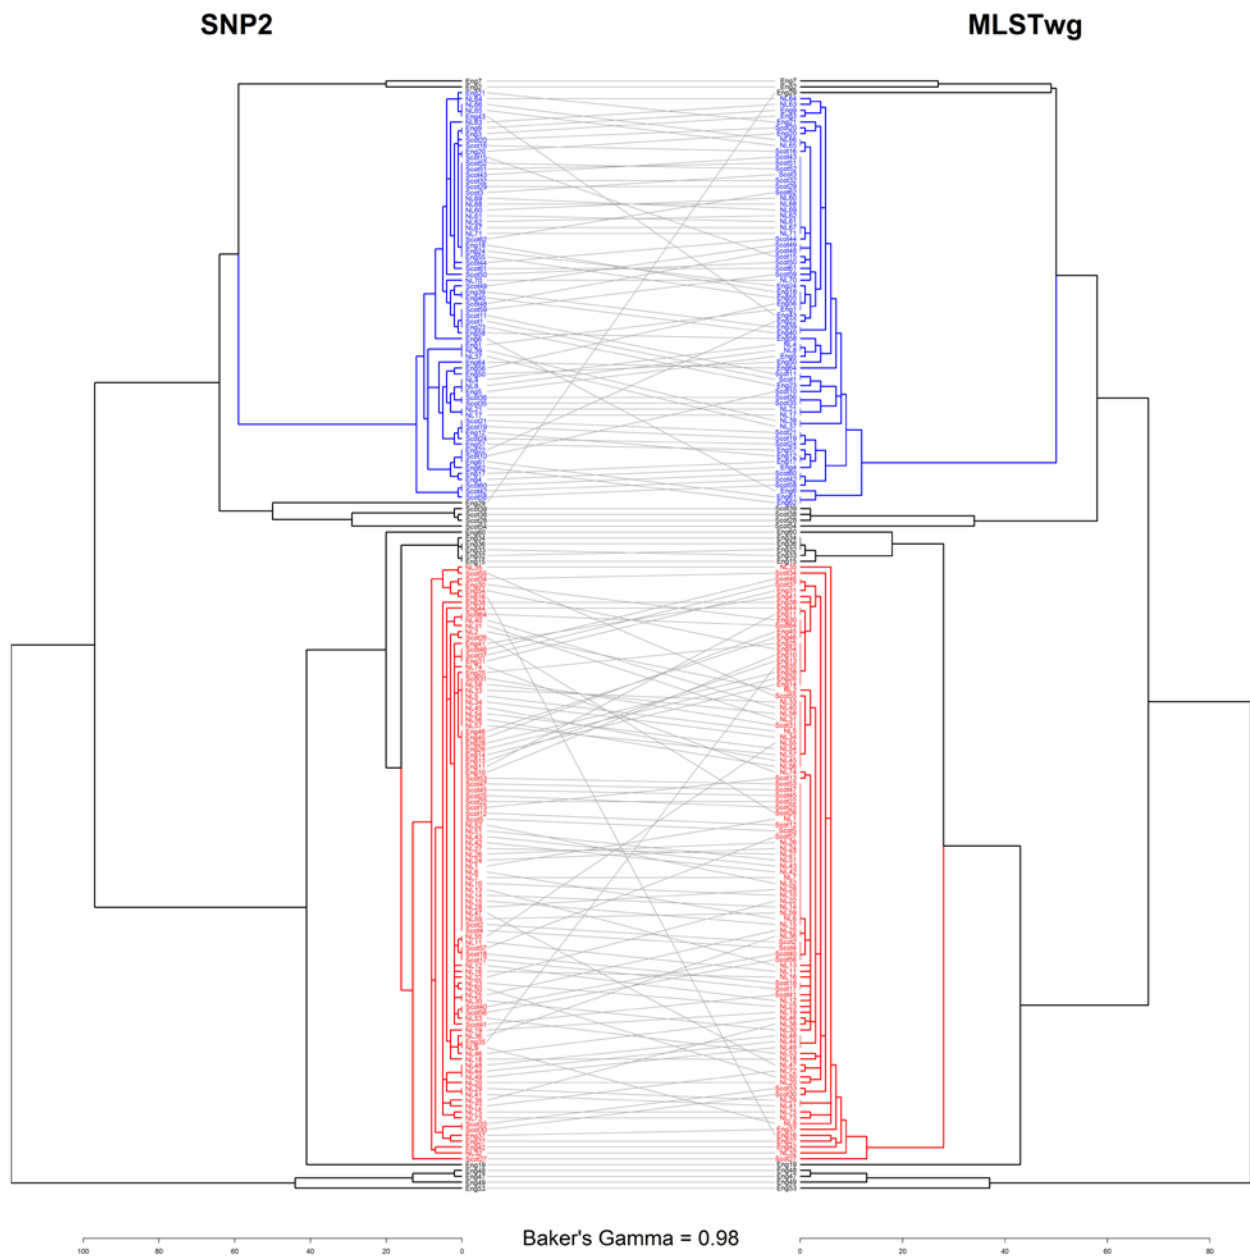

Figure S8. Tanglegram of SNP2 and MLSTwg partitions using complete linkage. The outbreak clusters 1 and 2 are shown in red and blue, respectively.



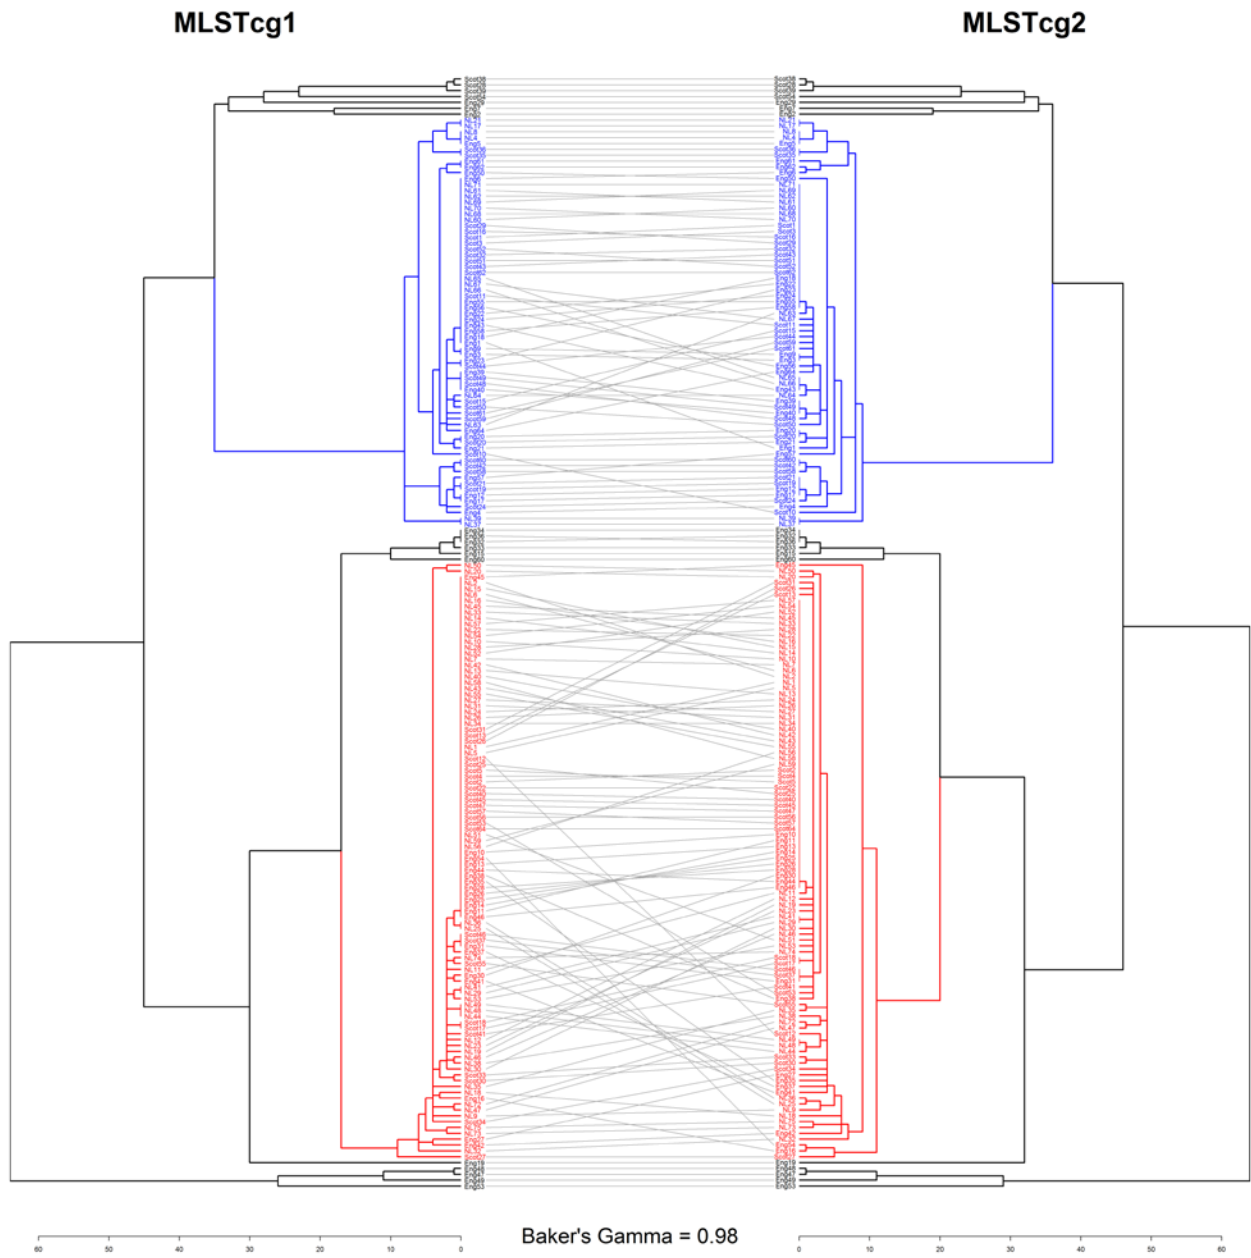

Figure S9. Tanglegram of MLSTcg1 and MLSTcg2 partitions using complete linkage. The outbreak clusters 1 and 2 are shown in red and blue, respectively.

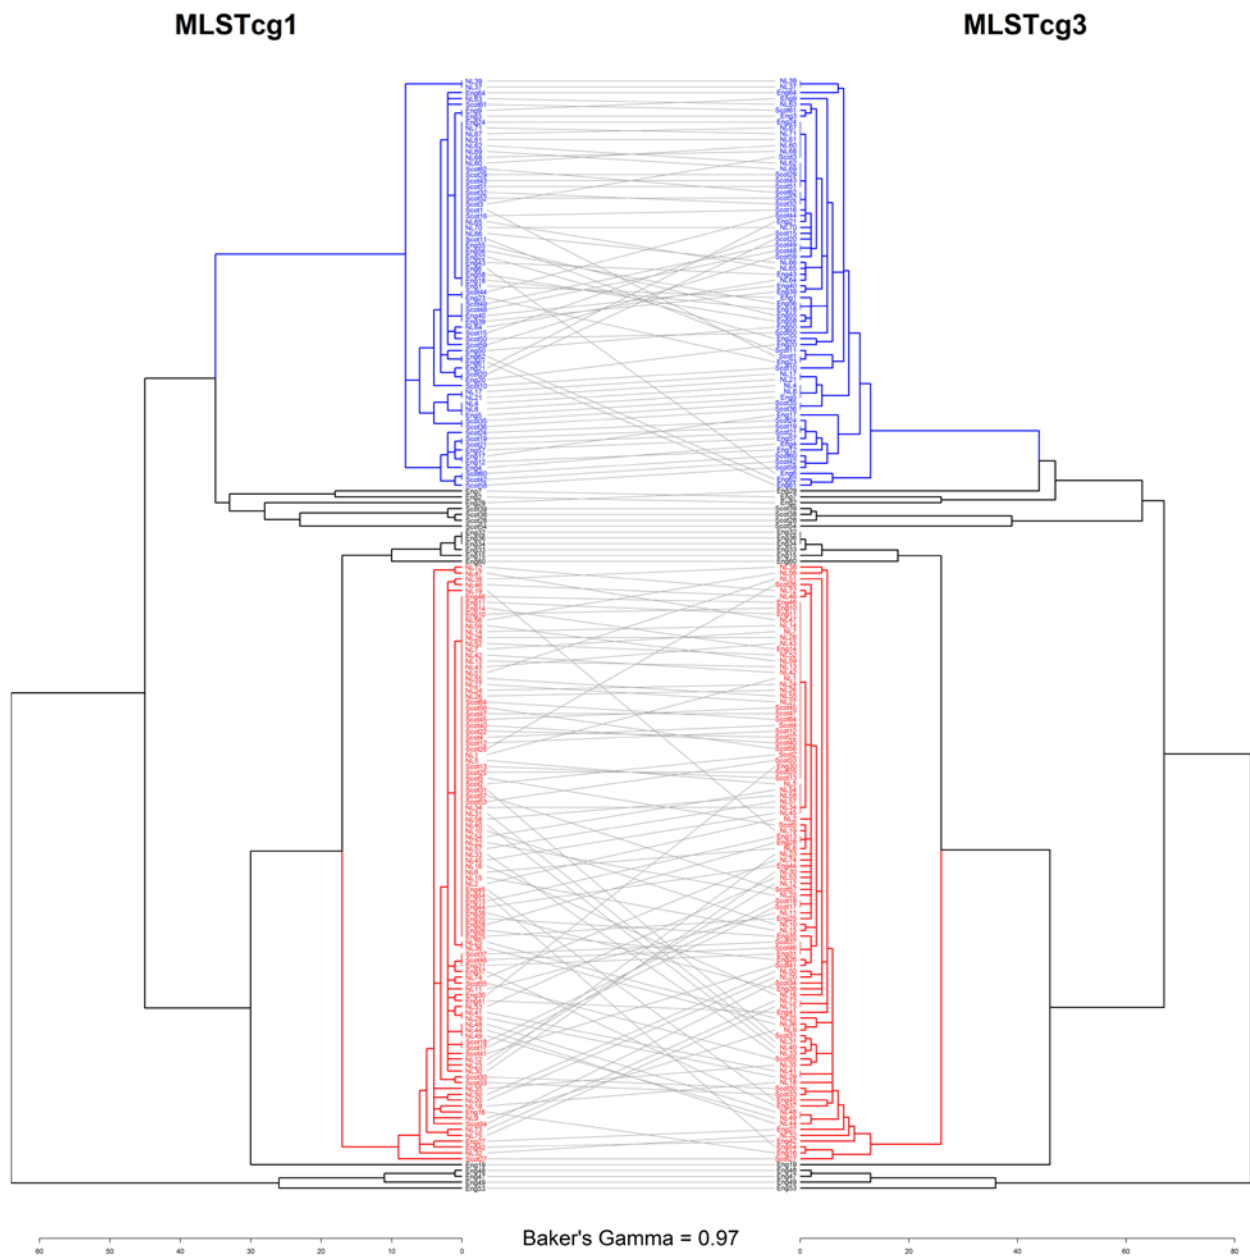

Figure S10. Tanglegram of MLSTcg1 and MLSTcg3 partitions using complete linkage. The outbreak clusters 1 and 2 are shown in red and blue, respectively.

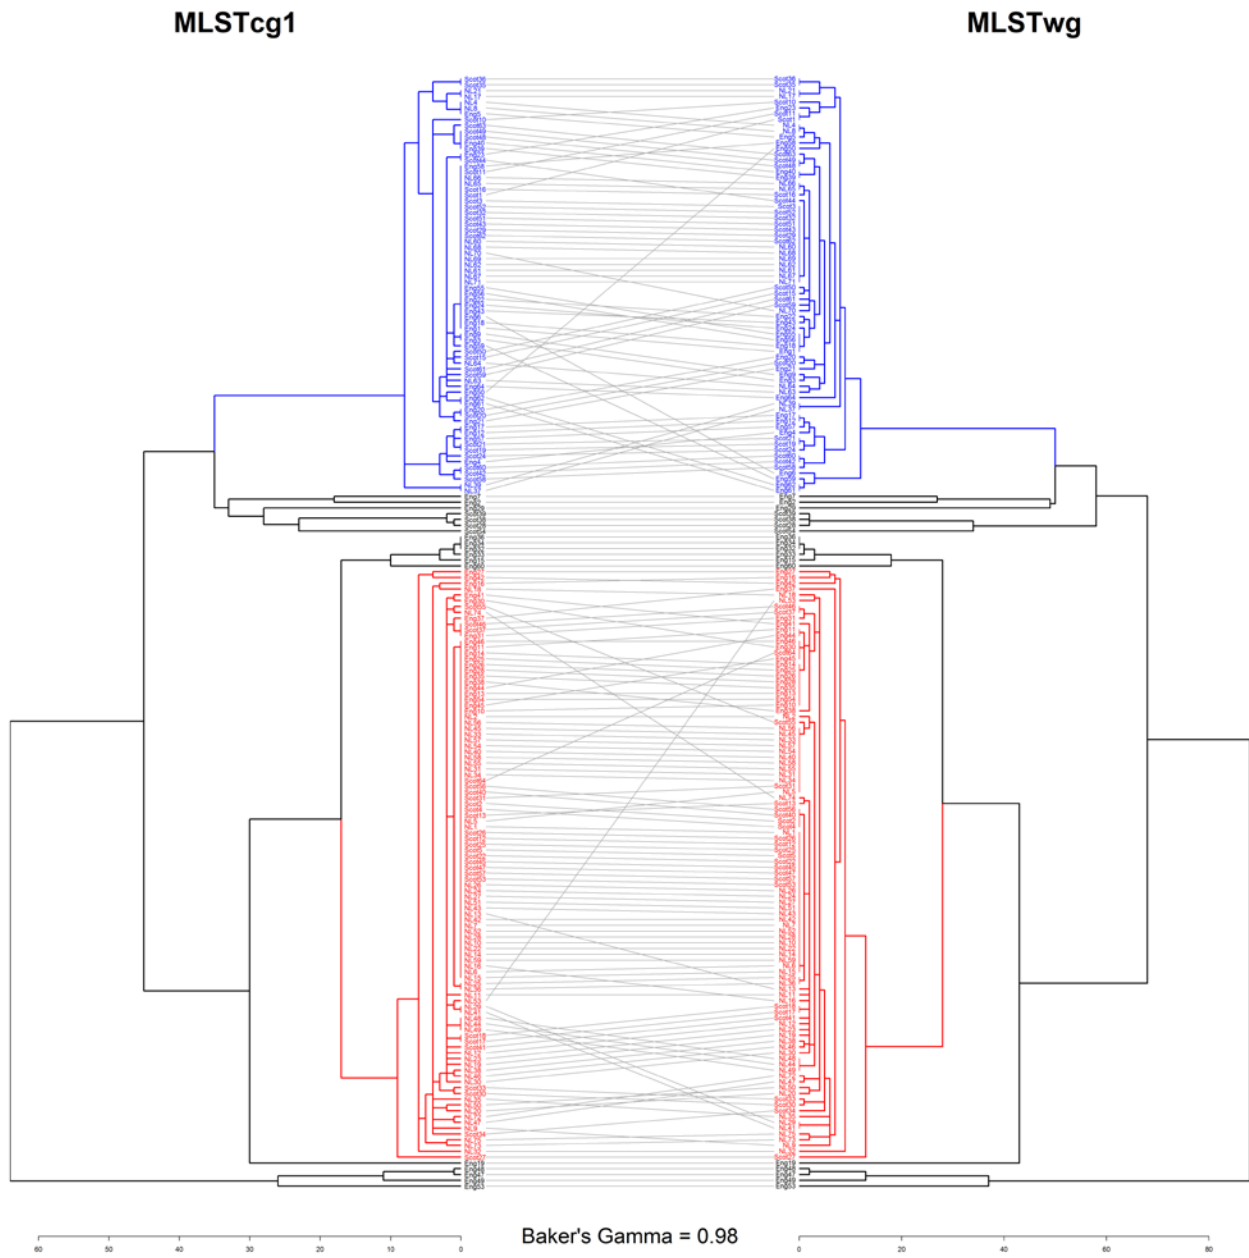

Figure S11. Tanglegram of MLSTcg1 and MLSTwg partitions using complete linkage. The outbreak clusters 1 and 2 are shown in red and blue, respectively.

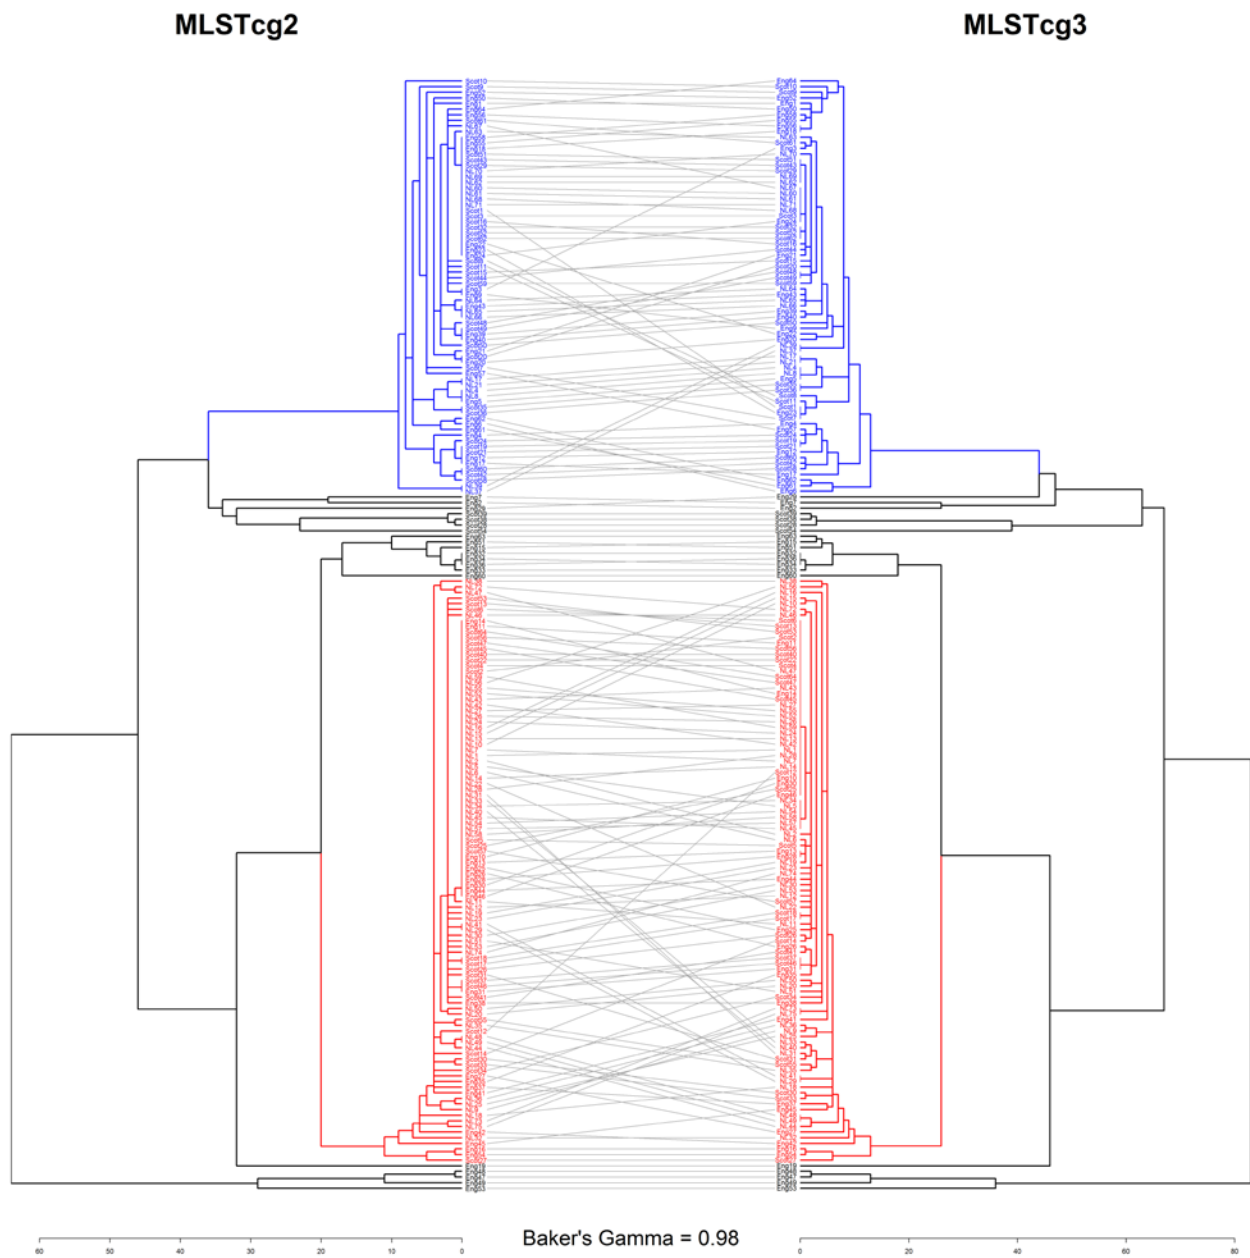

Figure S12. Tanglegram of MLSTcg2 and MLSTcg3 partitions using complete linkage. The outbreak clusters 1 and 2 are shown in red and blue, respectively.

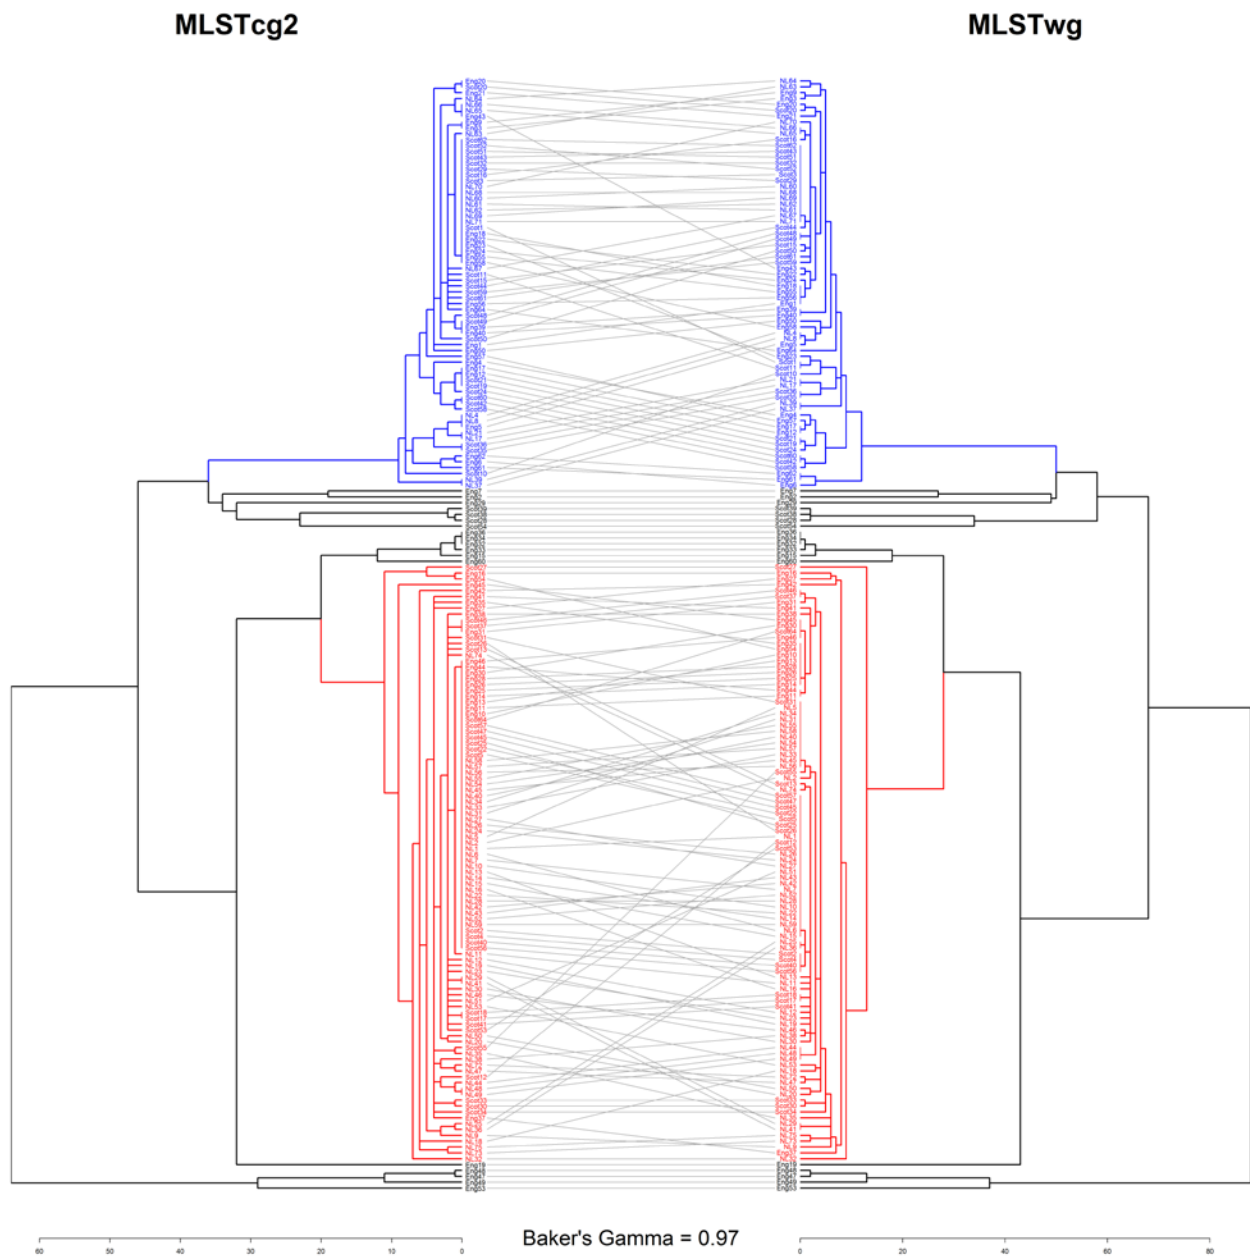

Figure S13. Tanglegram of MLSTcg2 and MLSTwg partitions using complete linkage. The outbreak clusters 1 and 2 are shown in red and blue, respectively.

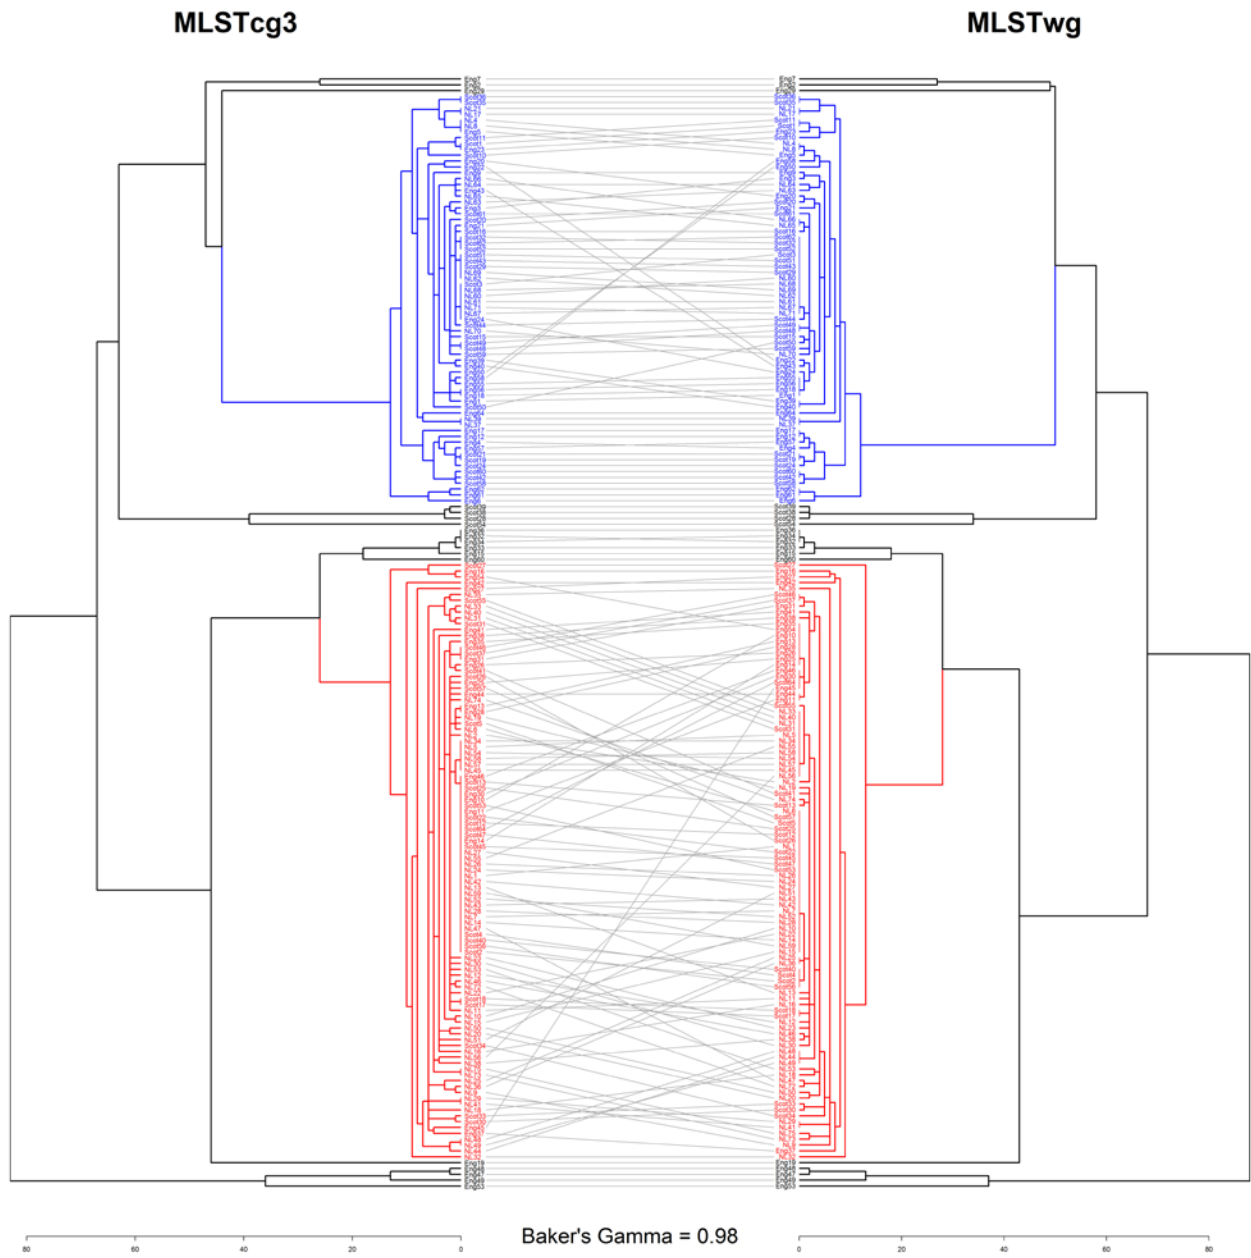

Figure S14. Tanglegram of MLSTcg3 and MLSTwg partitions using complete linkage. The outbreak clusters 1 and 2 are shown in red and blue, respectively.
